# Supplementary material
Source: Elsevier journal article supplement (https://www.sciencedirect.com/science/article/pii/S0365669121002392)
Supplement: mmc1 [file S0365669121002392:mmc1.docx]

Anexo. Cuestionario traducido.

(PARA EL OFTALMÓLOGO)

EDAD DEL NIÑO/A…………………….. AÑOS NIÑO NIÑA

HORAS DE ESCUELA AL DÍA 4 H 8 H

OD – ESFERA…………………… CILINDRO………………….. EJE……………….

OI – ESFERA…………………… CILINDRO………………….. EJE……………….

EN UN DÍA DE ESCUELA TÍPICO, DE LUNES A VIERNES.....

(Si su hijo/a viaja en coche o autobús, deje la primera pregunta en blanco)

Si su hijo/a va a la escuela caminando o en bicicleta, ¿cuánto tiempo tarda?….......H...…..Min.

¿Su hijo/a atiende clases de tutoría después de la escuela? SI NO

¿Cuántas horas al día pasa al aire libre después de la escuela?…….……….....H………...Min.

¿Cuántas horas al día pasa leyendo y escribiendo en casa?….…...……..H…..……...Min.

¿Cuántas horas al día utiliza teléfonos móviles o tablets?...…..………..H….……….Min.

EN CUALQUIER DÍA DE FIN DE SEMANA…….

¿Cuántas horas al día pasa al aire libre?…….……….....H………...Min.

¿Cuántas horas al día pasa leyendo y escribiendo?….…...……..H…..……...Min.

¿Cuántas horas al día utiliza teléfonos móviles o tablets?...…..………..H….……….Min.

MUCHAS GRACIAS POR SU COLABORACIÓN
